# Supplementary material for: The Association between Influenza Vaccination and the Risk of SARS-CoV-2 Infection, Severe Illness, and Death: A Systematic Review of the Literature
Source: Int J Environ Res Public Health. 2020 Oct 27;17(21):7870. doi: 10.3390/ijerph17217870 (PMC7672609; doi:10.3390/ijerph17217870)
Supplement: Supplementary file 1 [file ijerph-17-07870-s001.xls]

## Sheet: NOS cohort, nested case-control
Newcastle-Ottawa quality assessment scale	Pawlowski, 2020	Vila-Corcoles, 2020	Murillo-Zamora, 2020	Poblador-Plou
Selection
1) Representativeness of the exposed cohort	1	1	1	1
2) Selection of the non-exposed cohort	1	1	1	1
3) Ascertainment of exposure	1	1	1	1
4) Demonstration that outcome of interest was not present at start of study	1	1	1	1
Comparability
1) Comparability of cohorts on the basis of the design or analysis	2	2	0	1
Outcome
1) Assessment of outcome	1	1	1	1
2) Was follow-up long enough for outcomes to occur	1	1	1	1
3) Adequacy of follow-up of cohorts	0	1	1	1
	8	9	7	8

## Sheet: NOS case-control
Newcastle-Ottawa quality assessment scale	Aziz, 2020	Caban-Martinez, 2020	Donato, 2020	Jehi, 2020 [9]	Noale, 2020	Jehi, 2020 [13]	Fink, 2020	Ortiz-Pratdo, 2020
Selection
1) Is the case definition adequate?	1	1	0	1	0	1	1	1
2) Representativeness of the cases	1	1	1	1	0	1	1	1
3) Selection of controls	1	1	1	1	1	1	1	1
4) Definition of controls	1	1	1	1	1	1	1	1
Comparability
1) Comparability of cases and controls on the basis of the design or analysis	0	0	0	0	2	0	2	2
Exposure
1) Ascertainment of exposure	0	0	0	1	0	1	1	1
2) Same method of ascertainment for cases and controls	1	1	1	1	1	1	1	1
3) Non-response rate	0	1	1	1	0	1	1	1
	5	6	5	7	5	7	9	9
